# Supplementary material for: Impact of phytosterols on liver and distal colon metabolome in experimental murine colitis model: an explorative study
Source: PubMed Central journal article supplement (PMC6522980; doi:10.1080/14756366.2019.1611802), 2019-05-10
Supplement: IENZ_A_1611802_SM8107.pdf [file IENZ_A_1611802_SM8107.pdf]

## **Supplementary Information**

### **Impact of phytosterols on liver and distal colon metabolome in experimental murine colitis model**

Nunzia Iaccarino<sup>1</sup>, Jussara Amato<sup>1,\*</sup>, Bruno Pagano<sup>1</sup>, Anna Di Porzio<sup>1</sup>, Ettore Novellino<sup>1</sup>, Matteo Micucci<sup>2</sup>, Luca Bolelli<sup>2</sup>, Rita Aldini<sup>2</sup>, Roberta Budriesi<sup>2</sup>, Antonio Randazzo<sup>1,\*</sup>

<sup>1</sup>Department of Pharmacy, University of Naples Federico II, 80131 Naples, Italy.

<sup>2</sup>Department of Pharmacy and Biotechnology, University of Bologna, 40126 Bologna, Italy.

## Table of Contents

|   | Content                                                                                                                                                                                                                                               | Page |
|---|-------------------------------------------------------------------------------------------------------------------------------------------------------------------------------------------------------------------------------------------------------|------|
| 1 | <b>Figure S1.</b> Chemical structure of the administered phytosterols.                                                                                                                                                                                | S3   |
| 2 | <b>Figure S2.</b> Representative GC-MS chromatograms obtained from the metabolome analysis of (A) liver and (B) distal colon.                                                                                                                         | S4   |
| 3 | <b>Figure S3.</b> Pathway analysis of (A) colon and (C) liver extracts and metabolite set enrichment overview of (B) colon and (D) liver extracts.                                                                                                    | S5   |
| 4 | <b>Table S1.</b> Composition of phytosterols preparation.                                                                                                                                                                                             | S6   |
| 5 | <b>Table S2.</b> List of all metabolites identified in liver and colon extracts by GC-MS. Full name, short name, RT, RI, RI(NIST), $\Delta$ RI, ID level, CAS registry number and <i>p</i> -value from one-way ANOVA are indicated for each compound. | S7   |
| 6 | <b>Table S3.</b> List of all metabolites identified in liver samples by NMR.                                                                                                                                                                          | S9   |

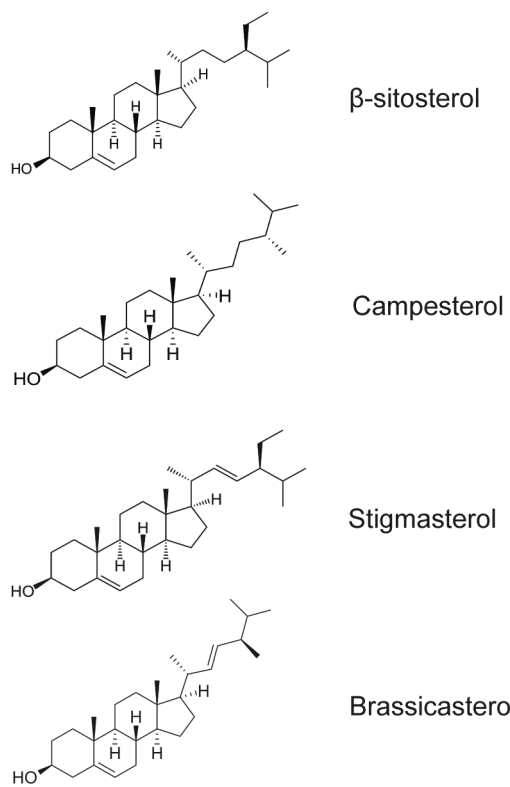

**Figure S1.** Chemical structure of the administered phytosterols.

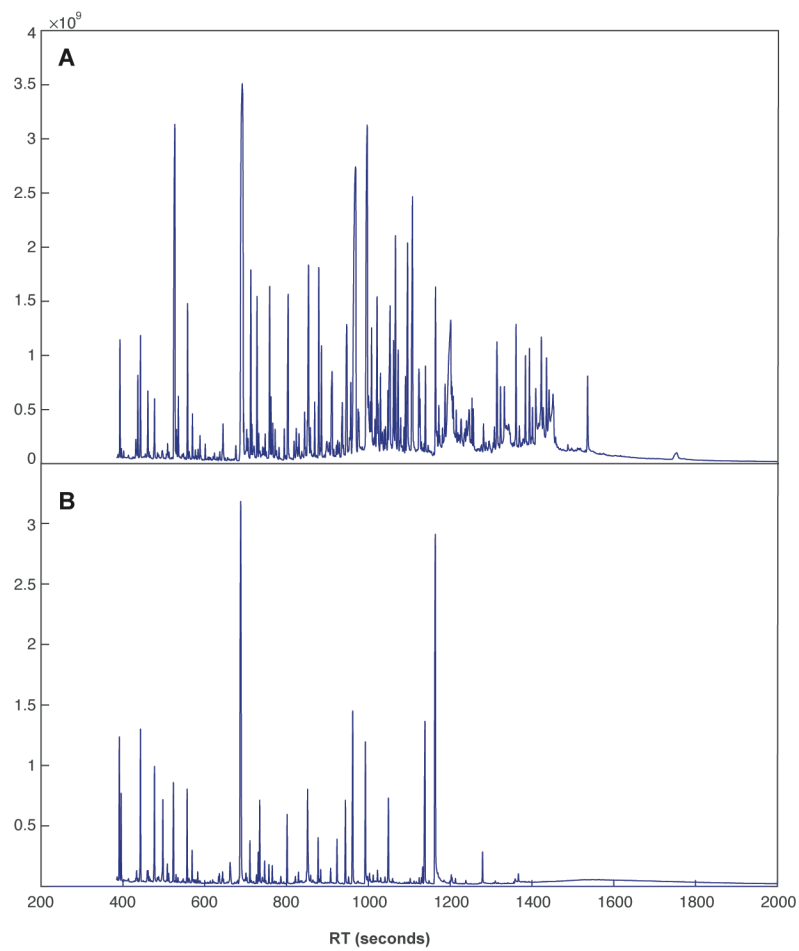

**Figure S2.** Representative GC-MS chromatograms obtained from the metabolome analysis of (A) liver and (B) distal colon.

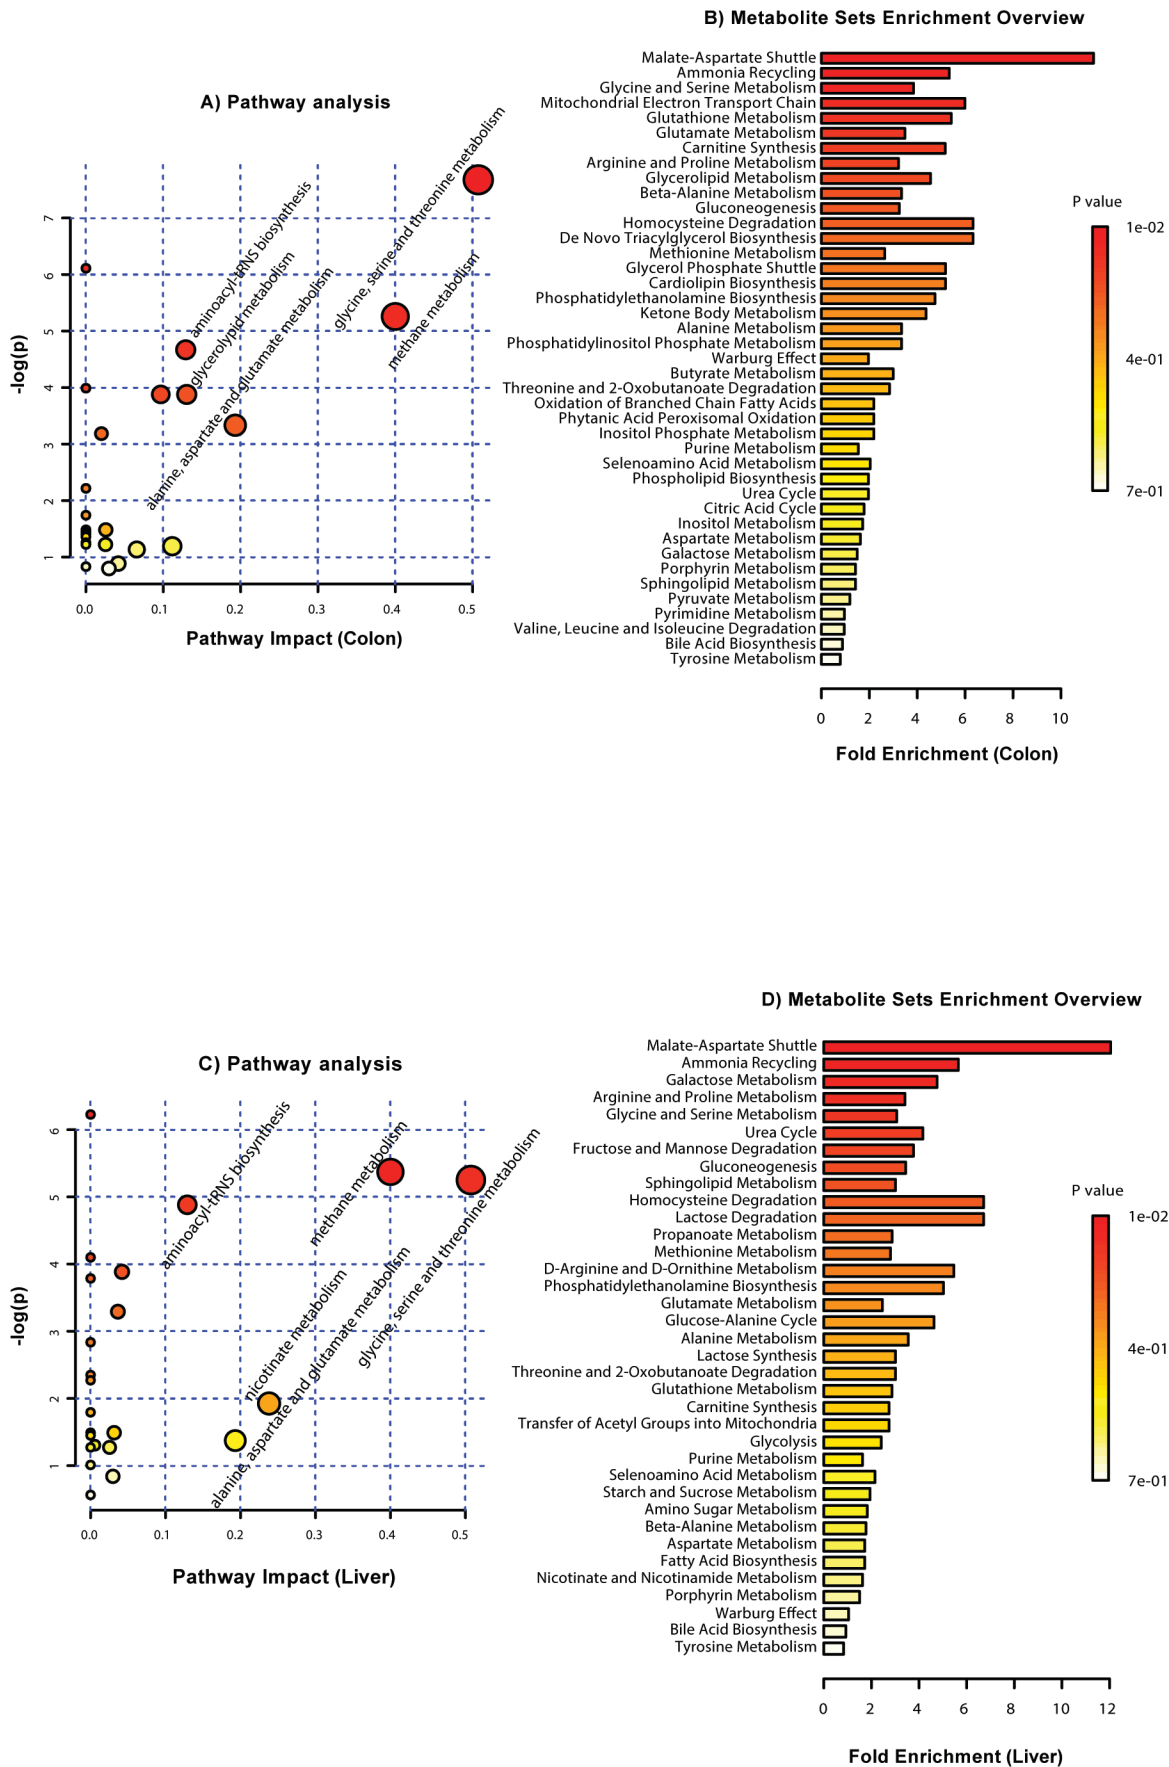

**Figure S3.** Pathway analysis of (A) colon and (C) liver extracts and metabolite set enrichment overview of (B) colon and (D) liver extracts.

**Table S1.** Composition of Phytosterols preparation.

| <b>Ingredient</b>                         | <b>Quantity (mg/4 pearls)</b> |
|-------------------------------------------|-------------------------------|
| Mixture of phytosterols (from soy)        | 2000 mg                       |
| <i>Total plant sterol esters</i>          | 1800 mg                       |
| Edible gelatin                            | 931 mg                        |
| Agent of resistance                       |                               |
| <i>Glycerol</i>                           | 429 mg                        |
| Carthamus Tinctorius (Safflower) Seed Oil | 180 mg                        |
| Dye                                       |                               |
| <i>Caramel</i>                            | 68 mg                         |

**Table S2.** List of all metabolites identified in liver and colon extracts by GC-MS. Full name, short name, RT, RI, RI(NIST),  $\Delta$ RI, ID level, CAS registry number and *p*-value from one-way ANOVA are indicated for each compound.

| ID #         | Metabolite full name from NIST <sup>a</sup>                                                         | Metabolite short name <sup>b</sup> | RT (s) <sup>c</sup> | RI <sup>d</sup> | RI (NIST) <sup>e</sup> | $\Delta$ RI <sup>f</sup> | ID <sup>g</sup> | CAS <sup>h</sup> | One-way ANOVA <sup>i</sup> |          |          |          |          |          |
|--------------|-----------------------------------------------------------------------------------------------------|------------------------------------|---------------------|-----------------|------------------------|--------------------------|-----------------|------------------|----------------------------|----------|----------|----------|----------|----------|
|              |                                                                                                     |                                    |                     |                 |                        |                          |                 |                  | CT-PH                      | CT-DS    | CT-PD    | PH-DS    | PH-PD    | DS-PD    |
| <b>Liver</b> |                                                                                                     |                                    |                     |                 |                        |                          |                 |                  |                            |          |          |          |          |          |
| 1            | Formamide, 2TMS derivative                                                                          | Formamide, 2TMS                    | 431.2               | 955.2           | 948                    | -7.2                     | 2               | 15500-60-4       | N.S.                       | 3.17E-02 | N.S.     | 8.42E-03 | 3.29E-02 | N.S.     |
| 2            | Disilathiane, hexamethyl-                                                                           | Sulfide, 2TMS                      | 435.9               | 961.1           | 963.1                  | 2                        | 2               | 3385-94-2        | N.S.                       | 1.95E-05 | N.S.     | 2.34E-05 | N.S.     | N.S.     |
| 3            | Silanimine, N,N -methanetetraylbis[1,1,1-trimethyl-                                                 | Carbodiimide, 2TMS                 | 442.7               | 969.6           | 964                    | -5.6                     | 2               | 1000-70-0        | N.S.                       | 3.40E-04 | N.S.     | 7.74E-04 | N.S.     | N.S.     |
| 4            | Ethanolamine, 2TMS derivative                                                                       | Ethanolamine, 2TMS                 | 497.4               | 1037.9          | 1020.8                 | -17.1                    | 2               | 17165-52-5       | N.S.                       | 3.77E-09 | N.S.     | 3.78E-09 | N.S.     | 3.79E-08 |
| 5            | Lactic Acid, 2TMS derivative                                                                        | Lactic Acid, 2TMS                  | 524.6               | 1071.8          | 1086                   | 14.2                     | 2               | 17596-96-2       | N.S.                       | N.S.     | N.S.     | N.S.     | N.S.     | N.S.     |
| 6            | Glycolic acid, 2TMS derivative                                                                      | Glycolic acid, 2TMS                | 535                 | 1084.9          | 1070.5                 | -14.4                    | 2               | 33581-77-0       | 5.58E-03                   | N.S.     | 1.95E-03 | N.S.     | N.S.     | 3.50E-02 |
| 7            | L-Alanine, 2TMS derivative                                                                          | L-Alanine, 2TMS                    | 557.6               | 1113.1          | 1105.3                 | -7.8                     | 2               | 27844-07-1       | 4.49E-02                   | N.S.     | N.S.     | 6.84E-03 | 7.36E-05 | N.S.     |
| 8            | Glycine, di-TMS                                                                                     | Glycine, 2TMS                      | 569.2               | 1127.6          | 1121.5                 | -6.1                     | 2               | 7364-42-3        | 2.10E-05                   | 1.04E-05 | N.S.     | 3.77E-09 | 1.20E-03 | 2.14E-07 |
| 9            | 2-Hydroxybutyric acid, 2TMS derivative                                                              | 2-Hydroxybutyric acid, 2TMS        | 576.2               | 1136.4          | 1136                   | -0.4                     | 2               | 55133-93-2       | N.S.                       | 4.87E-09 | 4.71E-06 | 2.21E-05 | 2.24E-02 | N.S.     |
| 10           | 3-Pyridinol, TMS derivative                                                                         | 3-Pyridinol, TMS                   | 581.5               | 1143            | 1134.1                 | -8.9                     | 2               | 41571-88-4       | 8.47E-03                   | 1.27E-02 | N.S.     | 1.00E+00 | N.S.     | N.S.     |
| 11           | Hydracrylic acid, 2TMS derivative                                                                   | Hydracrylic acid, 2TMS             | 587.7               | 1150.7          | 1151                   | 0.3                      | 2               | 55162-32-8       | N.S.                       | 3.98E-02 | 1.47E-02 | 8.47E-01 | N.S.     | N.S.     |
| 12           | 3-Hydroxybutyric acid, 2TMS derivative                                                              | 3-Hydroxybutyric acid, 2TMS        | 600.4               | 1166.6          | 1167                   | 0.4                      | 2               | 55133-94-3       | N.S.                       | 3.77E-09 | N.S.     | 3.79E-09 | N.S.     | 3.86E-09 |
| 13           | Tris(trimethylsilyl)carbamate                                                                       | Carbamate, 3TMS                    | 633.7               | 1203.5          | 962                    | -241.5                   | 3               | 91719351*        | N.S.                       | 7.15E-03 | 4.94E-02 | N.S.     | N.S.     | N.S.     |
| 14           | L-Valine, 2TMS derivative                                                                           | L-Valine, 2TMS                     | 643.8               | 1208.9          | 1208.4                 | -0.5                     | 2               | 7364-44-5        | 4.15E-03                   | N.S.     | 6.77E-06 | 7.90E-04 | N.S.     | 1.22E-06 |
| 15           | Benzoic Acid, TMS derivative                                                                        | Benzoic acid, TMS                  | 664.2               | 1219.8          | 1242                   | 22.2                     | 2               | 2078-12-8        | N.S.                       | 4.14E-09 | 1.15E-03 | 3.60E-07 | N.S.     | 1.17E-03 |
| 16           | Urea, 2TMS derivative                                                                               | Urea, 2TMS                         | 669.1               | 1222.4          | 1237                   | 14.6                     | 2               | 18297-63-7       | N.S.                       | 3.34E-04 | N.S.     | 6.21E-04 | N.S.     | 1.69E-02 |
| 17           | Glycerol, 3TMS derivative                                                                           | Glycerol, 3TMS                     | 691.1               | 1234.1          | 1265.1                 | 31                       | 2               | 6787-10-6        | N.S.                       | N.S.     | N.S.     | 1.15E-03 | N.S.     | N.S.     |
| 18           | Silanol, trimethyl-, phosphate (3:1)                                                                | Phosphoric acid, 3TMS              | 692.4               | 1234.8          | 1263                   | 28.2                     | 2               | 10497-05-9       | N.S.                       | N.S.     | N.S.     | N.S.     | N.S.     | N.S.     |
| 19           | Niacin, TMS derivative                                                                              | Niacin, TMS                        | 698.2               | 1238            | 1257                   | 19                       | 2               | 25436-37-7       | N.S.                       | 2.09E-06 | N.S.     | 2.37E-08 | N.S.     | 9.74E-05 |
| 20           | L-Isoleucine, 2TMS derivative                                                                       | L-Isoleucine, 2TMS                 | 701.5               | 1239.7          | 1286.2                 | 46.5                     | 3               | 7483-92-3        | 2.06E-03                   | N.S.     | 3.33E-06 | 5.74E-04 | N.S.     | 9.81E-07 |
| 21           | L-Proline, 2TMS derivative                                                                          | L-Proline, 2TMS                    | 704.6               | 1241.4          | 1304.9                 | 63.5                     | 3               | 7364-47-8        | 1.21E-04                   | N.S.     | 6.59E-04 | N.S.     | N.S.     | N.S.     |
| 22           | Butanedioic acid, 2TMS derivative                                                                   | Succinic acid, 2TMS                | 711.9               | 1245.3          | 1314.4                 | 69.1                     | 3               | 40309-57-7       | N.S.                       | N.S.     | 1.19E-03 | N.S.     | 6.11E-03 | 2.58E-04 |
| 23           | 1-Monoacetin, 2O-TMS                                                                                | Glycerol monoacetate, 2TMS         | 714.5               | 1246.6          | 1323.7                 | 77.1                     | 3               | -                | N.S.                       | 3.59E-02 | 6.20E-03 | N.S.     | N.S.     | N.S.     |
| 24           | Glyceric acid, 3TMS derivative                                                                      | Glyceric acid, 3TMS                | 726.9               | 1253.3          | 1199                   | -54.3                    | 3               | 38191-87-6       | N.S.                       | N.S.     | N.S.     | N.S.     | N.S.     | N.S.     |
| 25           | Uracil, 2TMS derivative                                                                             | Uracil, 2TMS                       | 731.1               | 1255.5          | 1331.9                 | 76.4                     | 3               | 10457-14-4       | N.S.                       | N.S.     | N.S.     | N.S.     | N.S.     | N.S.     |
| 26           | Serine, 3TMS derivative                                                                             | Serine, 3TMS                       | 746.7               | 1263.9          | 1342.6                 | 78.7                     | 3               | 64625-17-8       | N.S.                       | 3.14E-05 | 2.37E-02 | 6.93E-04 | N.S.     | N.S.     |
| 27           | L-Threonine, 3TMS derivative                                                                        | L-Threonine, 3TMS                  | 765.2               | 1273.8          | 1367.4                 | 93.6                     | 3               | 7537-02-2        | N.S.                       | N.S.     | N.S.     | 7.26E-05 | N.S.     | 7.11E-03 |
| 28           | Pentanedioic acid, 2TMS derivative                                                                  | Pentanedioic acid, 2TMS            | 771                 | 1276.9          | 1394.5                 | 117.6                    | 3               | 55494-07-0       | 3.38E-07                   | 8.81E-03 | 4.34E-03 | 4.53E-02 | N.S.     | N.S.     |
| 29           | Butanoic acid, 3,4-bis(trimethylsilyloxy)-, trimethylsilyl ester                                    | 2-Deoxytetric acid, 3TMS           | 793.3               | 1288.8          | 1417.3                 | 128.5                    | 3               | 55191-53-2       | N.S.                       | N.S.     | N.S.     | N.S.     | N.S.     | N.S.     |
| 30           | Niacinamide, TMS derivative                                                                         | Niacinamide, TMS                   | 823                 | 1304.7          | 2041                   | 736.3                    | 3               | 91727260*        | N.S.                       | N.S.     | N.S.     | N.S.     | N.S.     | N.S.     |
| 31           | Malic acid, 3TMS derivative                                                                         | Malic acid, 3TMS                   | 829.4               | 1308.1          | 1496.9                 | 188.8                    | 3               | 38166-11-9       | N.S.                       | 1.25E-05 | 1.47E-04 | 1.62E-05 | 1.80E-04 | N.S.     |
| 32           | 4-Hydroxy-5-(hydroxymethyl)oxolan-2-one, 2TMS derivative                                            | 2-deoxy-ribo-1,4-lactone, 2TMS     | 843                 | 1315.3          | 1416                   | 100.7                    | 3               | -                | 3.55E-02                   | 1.23E-05 | N.S.     | 4.26E-09 | 1.97E-04 | 5.24E-03 |
| 33           | L-Aspartic acid, 3TMS derivative                                                                    | L-Aspartic acid, 3TMS              | 849.6               | 1318.9          | 1502.4                 | 183.5                    | 3               | 55268-53-6       | N.S.                       | 6.00E-04 | N.S.     | 1.99E-06 | 9.86E-04 | N.S.     |
| 34           | L-5-Oxoproline, 2TMS derivative                                                                     | L-5-Oxoproline, 2TMS               | 852.8               | 1320.6          | 1520.7                 | 200.1                    | 3               | 30274-77-2       | 2.05E-02                   | N.S.     | N.S.     | 3.14E-03 | 1.09E-02 | N.S.     |
| 35           | 2,3,4-Trihydroxybutyric acid tetrakis(trimethylsilyl) deriv., (, (R*, R*))                          | Threonic acid, 4TMS                | 867.8               | 1328.5          | 1518                   | 189.5                    | 3               | 528672*          | N.S.                       | N.S.     | N.S.     | N.S.     | N.S.     | N.S.     |
| 36           | 2,3,4-Trihydroxybutyric acid tetrakis(trimethylsilyl) deriv., (, (R*, R*)) (I)                      | Threonic acid, 4TMS (I)            | 877.5               | 1333.8          | 1518                   | 184.2                    | 3               | 528672*          | N.S.                       | N.S.     | N.S.     | 4.85E-03 | 1.04E-02 | N.S.     |
| 37           | L-Glutamic acid, 3TMS derivative                                                                    | L-Glutamic acid, 3TMS              | 908.1               | 1350.1          | 1629.4                 | 279.3                    | 3               | 15985-07-6       | N.S.                       | N.S.     | N.S.     | 9.81E-03 | 3.20E-02 | N.S.     |
| 38           | 2,3,4,5-Tetrahydroxypentanoic acid-1,4-lactone, tris(trimethylsilyl)-                               | Arabinonic acid, 1,4-lactone       | 920.6               | 1356.8          | 1662                   | 305.2                    | 3               | 74742-31-7       | 3.93E-02                   | N.S.     | N.S.     | 1.18E-04 | 1.71E-03 | N.S.     |
| 39           | Phosphoric acid, 2-(trimethylsilyloxy)-1-((trimethylsilyloxy)methyl)ethyl bis(trimethylsilyl) ester | Glycerol-2-phosphate, 4TMS         | 973.7               | 1385.2          | 1708.5                 | 323.3                    | 3               | 31038-12-7       | N.S.                       | N.S.     | 2.43E-03 | N.S.     | N.S.     | N.S.     |
| 40           | Phosphoric acid, bis(trimethylsilyl) 2,3-bis(trimethylsilyloxy)propyl ester                         | Glycerol-3-phosphate, 4TMS         | 996.9               | 1397.5          | 1787                   | 389.5                    | 3               | 31038-11-6       | N.S.                       | N.S.     | N.S.     | N.S.     | N.S.     | N.S.     |
| 41           | Ribonic acid, 2,3,4,5-tetrakis-O-(trimethylsilyl)-, trimethylsilyl ester                            | Ribonic acid, 5TMS                 | 1006.9              | 1910.1          | 1799                   | -111.1                   | 3               | 57197-35-0       | N.S.                       | N.S.     | N.S.     | N.S.     | N.S.     | N.S.     |

|              |                                                                             |                                     |        |        |        |         |   |            |          |          |          |          |          |          |
|--------------|-----------------------------------------------------------------------------|-------------------------------------|--------|--------|--------|---------|---|------------|----------|----------|----------|----------|----------|----------|
| 42           | D-(-)-Fructofuranose, pentakis(trimethylsilyl) ether (isomer 1)             | Fructofuranose, 5TMS                | 1022.9 | 1925.2 | 1792.1 | -133.1  | 3 | -          | N.S.     | 5.91E-04 | 1.80E-05 | 6.03E-03 | 3.00E-04 | N.S.     |
| 43           | D-Glucose, 5TMS derivative                                                  | D-Glucose, 5TMS                     | 1064.9 | 1964.9 | 1926   | -38.9   | 2 | 6736-97-6  | N.S.     | 3.02E-07 | 3.06E-03 | 3.86E-09 | 1.59E-06 | N.S.     |
| 44           | D-Glucose, 5TMS derivative (I)                                              | D-Glucose, 5TMS (I)                 | 1071.8 | 1971.4 | 1926   | -45.4   | 3 | 6736-97-6  | N.S.     | 1.52E-08 | 2.52E-06 | 7.11E-08 | 1.25E-05 | N.S.     |
| 45           | L-Glucono-1,4-lactone (2S,3R,4S,5S)-, 4TMS derivative                       | Galactonic acid 1,4-lactone, 4TMS   | 1077.8 | 1977.1 | 1981   | 3.9     | 2 | 523382*    | N.S.     | 5.39E-03 | 3.74E-03 | 1.14E-05 | 6.07E-06 | N.S.     |
| 46           | D-Sorbitol, hexakis(trimethylsilyl) ether                                   | Sorbitol, 6TMS                      | 1089.3 | 1987.9 | 1988   | 0.1     | 2 | 91746474*  | N.S.     | 4.78E-07 | 9.71E-04 | 8.91E-09 | 1.31E-05 | N.S.     |
| 47           | D-Glucose, 5TMS derivative (II)                                             | D-Glucose, 5TMS (II)                | 1106.5 | 2009.6 | 1926   | -83.6   | 3 | 6736-97-6  | N.S.     | 6.81E-06 | 2.62E-04 | 3.50E-05 | 1.11E-03 | N.S.     |
| 48           | D-Gluconic acid, 6TMS derivative                                            | D-Gluconic acid, 6TMS               | 1128.4 | 2057.4 | 2043   | -14.4   | 2 | 34290-52-3 | N.S.     | 2.39E-03 | N.S.     | 2.06E-04 | N.S.     | N.S.     |
| 49           | Myo-Inositol, 6TMS derivative                                               | Myo-Inositol, 6TMS                  | 1163.1 | 2132.9 | 2130   | -2.9    | 2 | 2582-79-8  | N.S.     | N.S.     | N.S.     | N.S.     | N.S.     | N.S.     |
| 50           | Glyceryl-glycoside TMS ether                                                | Glyceryl-glycoside TMS ether        | 1251.8 | 2337.7 | 2376   | 38.3    | 3 | 91733362*  | 6.38E-03 | N.S.     | N.S.     | 4.39E-04 | 2.35E-04 | N.S.     |
| 51           | Glyceryl-glycoside TMS ether (II)                                           | Glyceryl-glycoside TMS ether        | 1255   | 2345.3 | 2376   | 30.7    | 2 | 91733362*  | N.S.     | N.S.     | N.S.     | 4.78E-03 | 6.48E-03 | N.S.     |
| 52           | Inosine, 4TMS derivative                                                    | Inosine, 4TMS                       | 1359.7 | 2610.6 | 2564.4 | -46.2   | 3 | 6428469*   | N.S.     | 1.50E-03 | 2.17E-02 | 8.79E-03 | N.S.     | N.S.     |
| 53           | Adenosine, 4TMS derivative                                                  | Adenosine, 4TMS                     | 1383   | 2675.1 | 2625.8 | -49.3   | 3 | 53294-33-0 | N.S.     | N.S.     | N.S.     | N.S.     | N.S.     | N.S.     |
| <b>Colon</b> |                                                                             |                                     |        |        |        |         |   |            |          |          |          |          |          |          |
| 1            | Disilathiane, hexamethyl-                                                   | Sulfide, 2TMS                       | 436.1  | 961.3  | 963.1  | 1.8     | 2 | 3385-94-2  | N.S.     | 3.77E-09 | 3.77E-09 | 3.77E-09 | 3.77E-09 | 1.34E-02 |
| 2            | Ethanolamine, 2TMS derivative                                               | Ethanolamine, 2TMS                  | 497.6  | 1038.1 | 1020.8 | -17.3   | 2 | 17165-52-5 | 1.41E-08 | 4.07E-09 | 9.17E-06 | N.S.     | N.S.     | 3.74E-02 |
| 3            | Lactic Acid, 2TMS derivative                                                | Lactic Acid, 2TMS                   | 524.3  | 1071.5 | 1.086  | 14.5    | 2 | 17596-96-2 | N.S.     | 3.77E-09 | 1.59E-08 | 3.77E-09 | 7.11E-07 | 2.51E-03 |
| 4            | Glycolic acid, 2TMS derivative                                              | Glycolic acid, 2TMS                 | 534.7  | 1084.3 | 1070.5 | -13.8   | 2 | 33581-77-0 | N.S.     | 1.64E-06 | N.S.     | 2.43E-05 | N.S.     | 3.72E-04 |
| 5            | L-Alanine, 2TMS derivative                                                  | L-Alanine, 2TMS                     | 557    | 1112.3 | 1105.3 | -7      | 2 | 27844-07-1 | N.S.     | N.S.     | N.S.     | N.S.     | N.S.     | N.S.     |
| 6            | Glycine, di-TMS                                                             | Glycine, 2TMS                       | 569.1  | 1127.5 | 1121.5 | -6      | 2 | 7364-42-3  | N.S.     | N.S.     | N.S.     | N.S.     | N.S.     | N.S.     |
| 7            | Tris(trimethylsilyl)amine                                                   | Tris(trimethylsilyl)amine           | 570.3  | 1128.9 | 695    | -433.9  | 3 | 1586-73-8  | N.S.     | N.S.     | N.S.     | N.S.     | N.S.     | N.S.     |
| 8            | Oxalic acid, 2TMS derivative                                                | Oxalic acid, 2TMS                   | 578.4  | 1139.1 | 1.122  | -17.1   | 2 | 18294-04-7 | N.S.     | 3.77E-09 | 1.63E-02 | 3.78E-09 | N.S.     | 1.15E-08 |
| 9            | L-Valine, 2TMS derivative                                                   | L-Valine, 2TMS                      | 643.7  | 1208.9 | 1208.4 | -0.5    | 2 | 7364-44-5  | N.S.     | N.S.     | 3.24E-02 | N.S.     | N.S.     | N.S.     |
| 10           | Benzoic Acid, TMS derivative                                                | Benzoic Acid, TMS                   | 664.3  | 1219.8 | 1.242  | 22.2    | 2 | 2078-12-8  | N.S.     | 3.77E-09 | 3.77E-09 | 3.77E-09 | 3.98E-09 | 1.07E-02 |
| 11           | Ethanolamine, 3TMS derivative                                               | Ethanolamine, 3TMS                  | 681    | 1228.8 | 1257.4 | 28.6    | 2 | 5630-81-9  | N.S.     | N.S.     | N.S.     | N.S.     | N.S.     | N.S.     |
| 12           | L-Leucine, 2TMS derivative                                                  | L-Leucine, 2TMS                     | 684.1  | 1230.4 | 1276.4 | 46      | 3 | 7364-46-7  | N.S.     | 3.00E-06 | 5.60E-09 | 2.26E-08 | 3.78E-09 | N.S.     |
| 13           | Niacin, TMS derivative                                                      | Niacin, TMS                         | 698.0  | 1237.9 | 1.257  | 19.1    | 2 | 25436-37-7 | N.S.     | 3.85E-09 | 6.99E-06 | 1.15E-08 | 4.56E-04 | 1.96E-02 |
| 14           | Butanedioic acid, 2TMS derivative                                           | Succinic acid, 2TMS                 | 710.6  | 1244.6 | 1314.4 | 69.8    | 3 | 40309-57-7 | N.S.     | 3.67E-03 | 1.58E-07 | 6.35E-04 | 1.75E-08 | 3.18E-02 |
| 15           | Glyceric acid, 3TMS derivative                                              | Glyceric acid, 3TMS                 | 726.4  | 1.253  | 1318.4 | 65.4    | 3 | 38191-87-6 | N.S.     | 2.87E-04 | 9.53E-06 | 2.70E-04 | 8.37E-06 | N.S.     |
| 16           | Uracil, 2TMS derivative                                                     | Uracil, 2TMS                        | 730.8  | 1255.4 | 1331.9 | 76.5    | 3 | 10457-14-4 | N.S.     | 1.64E-04 | 3.53E-08 | 1.06E-05 | 4.99E-09 | N.S.     |
| 17           | Serine, 3TMS derivative                                                     | Serine, 3TMS                        | 746.5  | 1263.8 | 1342.6 | 78.8    | 3 | 64625-17-8 | N.S.     | N.S.     | N.S.     | N.S.     | N.S.     | N.S.     |
| 18           | L-Threonine, 3TMS derivative                                                | L-Threonine, 3TMS                   | 765.2  | 1273.8 | 1367.4 | 93.6    | 3 | 7537-02-2  | N.S.     | 1.03E-08 | 1.02E-06 | 6.12E-07 | 8.16E-05 | N.S.     |
| 19           | L-Aspartic acid, 2TMS derivative                                            | L-Aspartic acid, 2TMS               | 786.7  | 1285.2 | 1.427  | 141.8   | 3 | 8583068*   | N.S.     | 1.27E-04 | N.S.     | 5.77E-03 | N.S.     | 5.96E-03 |
| 20           | Malic acid, 3TMS derivative                                                 | Malic acid, 3TMS                    | 829.2  | 1.308  | 1496.9 | 188.9   | 3 | 38166-11-9 | N.S.     | 5.29E-05 | 2.06E-07 | 3.94E-02 | 5.28E-04 | N.S.     |
| 21           | L-Aspartic acid, 3TMS derivative                                            | L-Aspartic acid, 3TMS               | 849.2  | 1318.6 | 1502.4 | 183.8   | 3 | 55268-53-6 | N.S.     | 3.78E-09 | 1.04E-03 | 3.93E-09 | 8.61E-03 | 3.60E-05 |
| 22           | L-5-Oxoproline, 2TMS derivative                                             | L-5-Oxoproline, 2TMS                | 851.4  | 1319.8 | 1520.7 | 200.9   | 3 | 30274-77-2 | N.S.     | 3.93E-09 | 3.77E-09 | 6.07E-08 | 4.05E-09 | N.S.     |
| 23           | 2,3,4-Trihydroxybutyric acid tetrakis(trimethylsilyl) deriv., (. (R*, R*-)) | Threonic acid, 4TMS                 | 876.9  | 1333.4 | 1.518  | 184.6   | 3 | 528672*    | N.S.     | 2.06E-05 | 4.48E-03 | 4.24E-06 | 1.29E-03 | N.S.     |
| 24           | L-Glutamic acid, 3TMS derivative                                            | L-Glutamic acid, 3TMS               | 907.7  | 1349.9 | 1629.4 | 279.5   | 3 | 15985-07-6 | N.S.     | N.S.     | N.S.     | N.S.     | N.S.     | N.S.     |
| 25           | Phosphoric acid, bis(trimethylsilyl) 2,3-bis(trimethylsilyloxy)propyl ester | Glycerol-3-phosphate, 4TMS          | 992.7  | 1395.3 | 1743.1 | 347.8   | 3 | 31038-11-6 | N.S.     | 9.44E-04 | 9.12E-04 | 7.67E-03 | 7.60E-03 | N.S.     |
| 26           | Ribonic acid, 2,3,4,5-tetrakis-O-(trimethylsilyl)-, trimethylsilyl ester    | Ribonic acid, 5TMS                  | 997.7  | 1.398  | 1.799  | 401     | 3 | 57197-35-0 | N.S.     | 3.42E-02 | N.S.     | 1.39E-02 | N.S.     | N.S.     |
| 27           | Citric acid, 4TMS derivative                                                | Citric acid, 4TMS                   | 1022.2 | 1924.6 | 1.944  | 19.4    | 2 | 14330-97-3 | N.S.     | N.S.     | N.S.     | N.S.     | N.S.     | N.S.     |
| 28           | N,N-Dimethyl-2-isopropoxyethylamine                                         | N,N-Dimethyl-2-isopropoxyethylamine | 1059.1 | 1959.4 | 778    | -1181.4 | 3 | 71126-59-5 | N.S.     | 3.96E-02 | 2.31E-06 | 7.23E-03 | 1.60E-07 | 1.96E-02 |
| 29           | Scyllo-Inositol, 6TMS derivative                                            | Scyllo-Inositol, 6TMS               | 1132.7 | 2066.6 | 2.194  | 127.4   | 3 | 2582-79-8  | 2.47E-05 | 1.40E-05 | 1.15E-08 | 3.77E-09 | 3.77E-09 | N.S.     |
| 30           | Myo-Inositol, 6TMS derivative                                               | Myo-Inositol, 6TMS                  | 1163.6 | 2.134  | 2.194  | 60      | 3 | 2582-79-8  | N.S.     | 3.40E-02 | N.S.     | 2.34E-02 | 2.01E-01 | N.S.     |
| 31           | Phosphoric acid, bis[2,3-bis(trimethylsilyloxy)propyl] trimethylsilyl ester | Diglycerol phosphate                | 1204.7 | 2225.7 | 2.182  | -43.7   | 3 | 32046-28-9 | N.S.     | 5.26E-03 | 1.66E-03 | 6.13E-04 | 1.63E-04 | N.S.     |
| 32           | Inosine, 4TMS derivative                                                    | Inosine, 4TMS                       | 1360.1 | 2611.7 | 2564.4 | -47.3   | 3 | 6428469*   | N.S.     | N.S.     | N.S.     | 3.59E-04 | 9.78E-04 | N.S.     |

<sup>a</sup>Full names of metabolites are directly extracted from the NIST11 metabolite database. <sup>b</sup>Metabolite short names are IUPAC or generic names of the identified metabolites. <sup>c</sup>Retention times of deconvoluted peaks were calculated as a mean of RTs of each peak across all samples. <sup>d</sup>Based on these RTs, retention indices (RI) of metabolites were estimated using all even alkane mixture sample (C10-C40). <sup>e</sup>Reported RIs of identified metabolites were extracted from NIST 11 version 2.3. <sup>f</sup>Difference between the reported RI and the calculated RI. <sup>g</sup>Identification level of the metabolites. Level 1 if the peaks are confirmed using authentic standards; Level 2 when the peaks are identified based on their EI-MS  $\geq 80$  (%) and RI match ( $\pm 30$ ); Level 3 when the peaks are identified based only on their EI-MS  $\geq 80$  (%) and the RI match is larger than 30. <sup>h</sup>CAS number of identified metabolites. For the metabolites with no CAS number the PubChem CID number has been reported followed by a (\*). <sup>i</sup>One-way ANOVA test were performed to see if there are some variables significantly different among the groups: control (CT), control fed with phytosterols (PH), DSS treated (DS), DSS-treated fed with phytosterols (PD). Significance of effects within the different pairs of groups is evaluated by *P*-values. "N.S." = Not Significant (*P*>0.05).



**Table S3.** NMR assignment of the identified metabolites.

| Identification number | Metabolite                   | Chemical Shifts (ppm) |
|-----------------------|------------------------------|-----------------------|
| 1                     | Isoleucine, Leucine, Valine  | 0.94(t)               |
|                       |                              | 1.02(d)               |
|                       |                              | 0.97(d)               |
|                       |                              | 0.99(d)               |
|                       |                              | 1.05(d)               |
| 2                     | 3-hydroxybutyrate, 3-HB      | 1.20(d)               |
|                       |                              | 2.31(dd)              |
| 3                     | Lactate                      | 1.33(d)               |
|                       |                              | 4.13(q)               |
| 4                     | Alanine                      | 1.49(d)               |
|                       |                              | 3.81(q)               |
| 5                     | Acetate                      | 1.92(s)               |
| 6                     | Glutathione, GSH             | 2.54(m)               |
|                       |                              | 2.16(m)               |
| 7                     | Succinate                    | 2.40(s)               |
| 8                     | Choline                      | 3.20(s)               |
| 9                     | O-Phosphocholine, PC         | 3.23(s)               |
|                       |                              | 4.17(m)               |
| 10                    | Glycerophosphocholine, GPC   | 3.23(s)               |
|                       |                              | 3.62(m)               |
|                       |                              | 4.33(m)               |
| 11                    | Glycerol                     | 3.56(m)               |
|                       |                              | 3.66(m)               |
|                       |                              | 3.78(m)               |
| 12                    | Glucose                      | 3.39(m)               |
|                       |                              | 3.46(m)               |
|                       |                              | 3.53(m)               |
|                       |                              | 3.73(m)               |
|                       |                              | 3.84(m)               |
|                       |                              | 3.90(dd)              |
| 13                    | Glycogen                     | 5.24(d)               |
|                       |                              | 5.40(br s)            |
| 14                    | Uridine monophosphate, UMP   | 4.36(t)               |
|                       |                              | 5.98(m)               |
|                       |                              | 8.10(d)               |
| 15                    | Adenosine monophosphate, AMP | 4.02(dd)              |
|                       |                              | 4.36(dd)              |
|                       |                              | 4.51(dd)              |
|                       |                              | 6.14(d)               |
|                       |                              | 8.24(s)               |
|                       |                              | 8.59(s)               |
| 16                    | Formate                      | 8.44(s)               |
| 17                    | Niacinamide                  | 7.58(dd)              |
|                       |                              | 8.24(dd)              |
|                       |                              | 8.70(dd)              |
|                       |                              | 8.92(s)               |
